# Supplementary material for: Anaerobic conversion of the hydrothermal liquefaction aqueous phase: fate of organics and intensification with granule activated carbon/ozone pretreatment
Source: Royal Society of Chemistry journal article supplement (doi:10.1039/c8gc02907e), 2018-12-10
Supplement: c8gc02907e1.pdf [file c8gc02907e1.pdf]

**Anaerobic Conversion of Hydrothermal Liquefaction Aqueous phase:  
Fate of Organics and Intensification with Granule Activated  
Carbon/Ozone Pretreatment**

Buchun Si<sup>1,2</sup>, Libin Yang<sup>3</sup>, Xuefei Zhou<sup>3</sup>, Jamison Watson<sup>2</sup>, Giovana Tommaso<sup>4</sup>, Wan-Ting Chen<sup>2,5</sup>,  
Qiang Liao<sup>6</sup>, Na Duan<sup>1</sup>, Zhidan Liu<sup>1\*</sup>, Yuanhui Zhang<sup>1,2\*</sup>

<sup>1</sup> Laboratory of Environment-Enhancing Energy (E2E), Key Laboratory of Agricultural Engineering in Structure and Environment, Ministry of Agriculture, College of Water Resources and Civil Engineering, China Agricultural University, Beijing 100083, China (E-mail: [zdliu@cau.edu.cn](mailto:zdliu@cau.edu.cn))

<sup>2</sup> Department of Agricultural and Biological Engineering, University of Illinois at Urbana-Champaign, Urbana, IL, 61801, USA (E-mail: [yzhang1@illinois.edu](mailto:yzhang1@illinois.edu))

<sup>3</sup> State Key Laboratory of Pollution Control and Resource Reuse, College of Environmental Science and Engineering, Tongji University, Shanghai 200092, China

<sup>4</sup> Laboratory of Environmental Biotechnology, Department of Food Engineering, University of Sao Paulo, 225, Duque de Caxias Norte, Pirassununga, Sao Paulo 13635-900, Brazil

<sup>5</sup> Department of Plastic Engineering, University of Massachusetts Lowell, Lowell, MA, 01851, USA

<sup>6</sup> Key Laboratory of Low-grade Energy Utilization Technologies and Systems, Ministry of Education, Chongqing University, Chongqing 400044, China

**Fig. 1S** The changes of ammonia and COD concentrations in GAC added HTL aqueous phase (10 g COD/L).

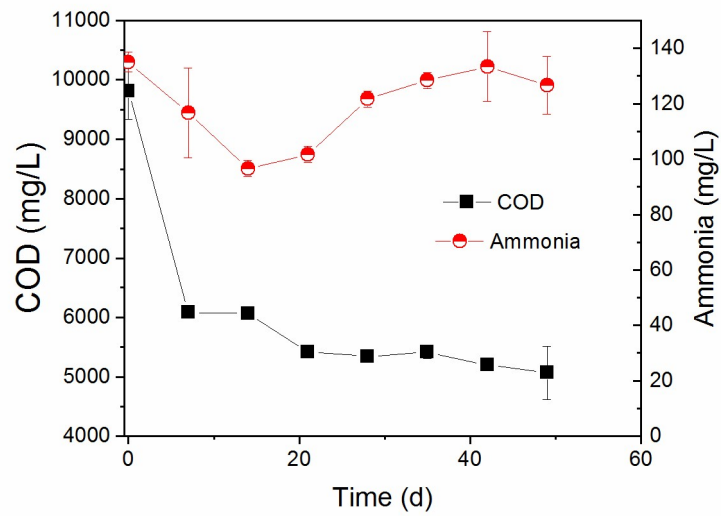

**Fig. 2S** MALDI-TOF-MS analysis of ozone pretreated HTL aqueous phase.

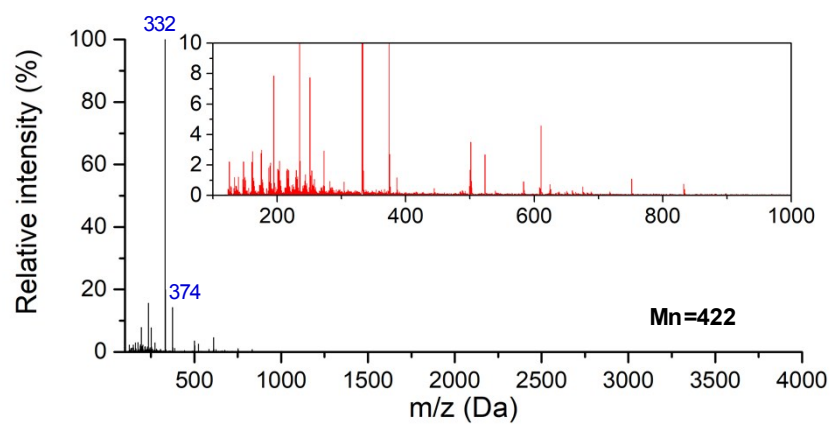

**Table 1S** The kinetic parameters from the modified Gompertz model

| Experimental set       | Mm       | Rm        | $\lambda$ | R <sup>2</sup> |
|------------------------|----------|-----------|-----------|----------------|
|                        | mL/g COD | mL/d·gCOD | d         |                |
| <b>OP<sub>1</sub></b>  | 217      | 17.9      | 9.0       | 0.984          |
| <b>OG<sub>1</sub></b>  | 215      | 17.6      | 7.7       | 0.986          |
| <b>GAC<sub>1</sub></b> | 213      | 17.3      | 6.5       | 0.993          |
| <b>C<sub>1</sub></b>   | 219      | 15.7      | 5.9       | 0.995          |
| <b>OP<sub>2</sub></b>  | 193      | 10.4      | 13.4      | 0.989          |
| <b>OG<sub>2</sub></b>  | 209      | 12.1      | 11.1      | 0.992          |
| <b>GAC<sub>2</sub></b> | 219      | 11.9      | 9.5       | 0.993          |
| <b>C<sub>2</sub></b>   | 180      | 9.3       | 12.2      | 0.994          |
| <b>OP<sub>r</sub></b>  | 146      | 7.5       | 14.0      | 0.983          |
| <b>OG<sub>r</sub></b>  | 208      | 11.4      | 6.1       | 0.983          |
| <b>GAC<sub>r</sub></b> | 217      | 11.3      | 3.7       | 0.978          |
| <b>C<sub>r</sub></b>   | 114      | 5.7       | 12.9      | 0.923          |
| <b>OP<sub>3</sub></b>  | 111      | 2.4       | 36.9      | 0.974          |
| <b>OG<sub>3</sub></b>  | 202      | 6.3       | 28.1      | 0.987          |
| <b>GAC<sub>3</sub></b> | 212      | 5.8       | 19.3      | 0.991          |
| <b>C<sub>3</sub></b>   | 53       | 1.1       | 36.3      | 0.853          |
